# Supplementary material for: Holocene sea-ice dynamics in Petermann Fjord
Source: Copernicus journal article supplement (doi:10.5194/tc-2021-25), 2021-02-15
Supplement: Supplementary file [file tc-2021-25-AC1-supplement.pdf]

## Answers to reviewer #1

Thank you very much for recognizing the importance of the data presented in this manuscript concerning the role of the marine cryosphere in stabilizing NW Greenland ice tongues. We appreciate the time and effort you have put into reviewing and improving our work. We would like to thank you for the constructive comments, which we have addressed individually below.

### **Specific comments (intermediate). Numbers link to the manuscript line number.**

1. I do like the short title, but I think you could expand upon this to include the broader regional implication of the study with regards to Nares Strait sea-ice dynamics. I suggest you adapt this to indicate the wider reach of this study.

Thank you very much for this suggestion, we have changed the title to '*Holocene sea-ice dynamics in Petermann Fjord in relation to ice tongue stability and Nares Strait ice arch formation*'. This version includes both a reference to ice tongue stability and Nares Strait ice arches, to reflect the narrative of the manuscript.

2. Figure 1a: can you add /label the deeper Atlantic water circulations on the map?

Thank you for this comment; we have labeled the purple Arctic Atlantic Water (AAW) on the map (Fig. 1 a). Further, we are now referring to this water mass as AAW instead of modified Atlantic Water in the text, to reflect Fig. 1a.

3. Section 2: Water depth and the location of sills appears to be an important control on the AW, but it is not clear where these sills are, in particular the 220 m deep sill in Kane Basin. Can you add either a bathymetric contour or sill on your Fig 1 b? or if that looks cluttered add a little bit more detail in the text.

We did not include the sill in Fig. 1a or Fig. 1b, as it would not have been clearly visible. Instead, we are describing in the text where the sill is located in Kane Basin ('At its shallowest, at the northern end of Kane Basin, Nares Strait is 220 m deep (Münchow and Melling, 2008)'). Thank you for this suggestion.

4. 115: can you add the current temperature of the modified AW and where it is located in the water column?

Thank you for this comment. We have added this information in the text ('*Below (>300 m in Hall Basin), the water column is characterized by AAW (0.28-0.31 °C; (Washam et al., 2018)) that has circulated through the Arctic Ocean (Jones and Eert, 2004).*').

5. 117: in this sentence you state 'This sill impedes the throughflow of the densest AW...' do you mean it prevents AW from the south altogether or is there a density gradient in the AW? If the former I suggest you rephrase to '...impedes the throughflow of the dense AW...'

As far as the authors are concerned, the question of AW origin in southern Nares Strait is not yet fully resolved. It is unclear to what extent AAW flowing southward through

Nares Strait spills over the 220 m shallow sill in Kane Basin. We have rephrased this section slightly to account for the ambiguity in existing observations (*'At its shallowest, at the northern end of Kane Basin, Nares Strait is 220 m deep (Münchow and Melling, 2008). This sill impedes the southward flow of AAW, suggesting that Atlantic Water at the southern end of Nares Strait is predominantly derived from the north flowing West Greenland Current (Fig. 1) instead (Melling et al., 2001).'*). Thank you for bringing this to our attention.

6. 137-140: Can you add a bit more detail for Fig. 2 in this section, such as years where landfast sea ice formation in PF acts independently to Nares Strait, and the sea-ice conditions at the time of the ice-tongue calving events?

Thank you for this comment, we have added additional information regarding the specific years we are referring to (*'The formation of landfast ice in Petermann Fjord is somewhat independent of the formation of landfast ice in Nares Strait. Landfast ice in Petermann Fjord will also form when sea ice in Nares Strait remains mobile throughout the winter (e.g. 2007, 2009, 2010; Fig. 2), although the sea-ice state in Nares Strait likely influences the timing of sea-ice break-up in Petermann Fjord in spring/summer, with earlier/later break-up during years without/with landfast sea ice in Nares Strait (Fig. 2, Supplementary Fig. 1).'*).

Information regarding the sea-ice state prior to the calving events was added to the introduction instead (*'Interestingly, the 2010 calving event fell at the end of a 4-year period with no/little landfast ice in Nares Strait and associated earlier break-up of landfast ice in Petermann Fjord (Fig. 2). The smaller calving event in 2012, on the other hand, followed the re-establishment of extensive landfast ice in Nares Strait in 2011 (Fig. 2).'*).

7. 140: add reference and detail on how productivity changes with sea-ice conditions. Also, how does Supplementary Figure 1 show PF with ice edge conditions in spring/summer? Can you add an example year in the text in line 142 *'...during years (e.g., )*.

As of yet, there are no studies on the importance of the sea-ice edge position for the local primary productivity in Nares Strait. The assumptions we are making here are our own, based on the observed sea-ice dynamics from satellite images of the last decades and the positive correlation of marine sterols with sea-ice biomarkers throughout the presented record, indicating the importance of sea ice for the local primary productivity. We have rephrased this section, to make sure the reader is made aware that these are our suggestions of how sea ice changes the primary productivity regime (*'Additionally, we propose that the sea-ice dynamics in Nares Strait likely have important implications for the primary productivity regime in Petermann Fjord, with ice edge conditions in spring/ early summer in years with mobile sea ice in Nares Strait (e.g. 2007 and 2009; Supplementary Fig. 1), while under landfast ice conditions in Nares Strait the spring/ early summer ice edge is situated several hundred kilometres to the southwest in Kane*

*Basin/Smith Sound (e.g. 2013 and 2014; Supplementary Fig. 1). Since the spring ice edge is a highly productive system, especially important for the sympagic algal bloom (Ardyna and Arrigo, 2020; Leu et al., 2015; Wassmann and Reigstad, 2011), the position of the Nares Strait ice edge is likely to play a role for the local primary productivity.').*

8. Section 3.1, pg 7: I would like to see a bit more detail for the core description added in this section. In line 179 and 180, can you add more detail on the '...coarser particles.' and '...coarse material...' respectively, such as rough grain size? Also, can you add where the core is laminated in this section rather than in the results?

Thank you very much for this comments, we have added additional information on the laminations and coarse particles and their origin in the different sedimentary units (*'Sedimentary unit 3 (ca. 518-555 cm) is a massive diamict composed of a sandy mud with abundant coarse clasts and XRF Ti/Ca ratios around 0.05 (Reilly et al., 2019). The clasts found in this unit, likely do not represent ice rafted debris (IRD), but instead are related to proximity of the grounding zone (Reilly et al., 2019). Unit 2, a clayey laminated mud with no or very low concentrations of coarser material (IRD), is found between ca. 398-518 cm (Reilly et al., 2019). (...) Subunit 1C is marked by a decreasing trend from high to intermediate IRD occurrence, with intermediate IRD abundances continuing during subunit 1B, followed by low IRD abundance during subunit 1A (Reilly et al., 2019).'*).

9. Section 3.3 Sea-ice biomarker methodology is very detailed. Does all this information need to be in the main text? Can some of it be moved into the supplementary section e.g., Table 2?

We are not sure if the reviewer refers to section 3.3.2 where the lipid biomarker extraction and analysis is described, or section 3.2 Sea-ice biomarker methodology. If the former, the analyses of the other proxies are also described in detail, which is why we do not think it would be appropriate to move only this information to the supplementary material. If the latter, we felt it was necessary to give an overview of the methodology and its caveats (e.g. in fjord environments (Ribeiro et al. 2017)) and regarding the difficulties measuring HBI III in Petermann Fjord. Even though sterols are commonly used in sea-ice reconstructions, we felt it was necessary to discuss their caveats and establish a framework for how we intend to interpret them in this study (and with what restrictions).

10. Section 3.3: Foraminifera abundances are interesting and provide potential information on productivity, but assemblage data would also be very insightful with regards to the sea-ice or ice tongue presence in the PF as well as the presence of AW (e.g., presence of the foraminifera *Cassidulina neoteritis*). Is there a reason assemblage counts have not been included here?

Thank you very much for this comment. Foraminiferal assemblage data was not included in this study, as it will be published in a separate manuscript.

11. 366-375: this section describes the DIP<sub>25</sub> results, but this is in the Supp info. Is there a reason for this or can this data set be moved into the main text?

Thank you for this suggestion. Considering the uncertainty of the DIP<sub>25</sub> index, it does not contribute to the main narrative of the manuscript. Instead, we only refer to more variable/less variable DIP<sub>25</sub> values in the discussion (so we are making very limited use of this index). This is why the graph is not included in the main text but rather the supplementary material.

12. General results section comment. The core stratigraphy and environmental interpretations are sporadically included within the results section. In doing so there is some repetition e.g., line 332 and 349 and new information on the core is added intermittently (e.g., lines 353-354). I would suggest removing the interpretation and sedimentology detail out of the results section unless it is needed to justify why data has not been included (e.g., lines 329-331). Instead, I would like to see this detail added to the methods section (3.1) when the core is initially described and within the discussion section where the multiproxy results can be linked to the core interpretation.

Thank you for this comment. We agree with the reviewer that there was some repetition and interpretations in the results section. We have removed these and moved the information regarding sedimentology to section 3.1 instead (see answer to comment #8).

13. Lines 470-475: could another explanation for the lower terrestrial input during the reestablishment of the ice tongue be related to grounding-line proximity to the core location?

During this time period the grounding zone is further away from the core site compared to the mid/early Holocene. As the reviewer points out, this can result in decreased delivery of terrestrial C<sub>org</sub> transported for example in the meltwater discharged at the grounding zone. We have added this to the manuscript (*'Compared to the deglacial PG ice tongue, the late Holocene ice tongue (<2,100 cal yrs BP) (Reilly et al., 2019) does not seem to be associated with increased input of terrestrial organic matter to outer Petermann Fjord (Fig. 5). A possible explanation could be lower atmospheric temperatures compared to the early Holocene (Lecavalier et al., 2017), associated with a less diverse and more sparse terrestrial flora in the high Arctic (Gajewski, 2015) and decreased meltwater input. Another reason could be increased distance of OD1507-03TC-41GC-03PC from the PG grounding zone during the late Holocene (Reilly et al., 2019), resulting in reduced delivery of meltwater-derived C<sub>org</sub>.'*).

14. Figure 5h: the reconstructed ice-tongue extent (km) at ~590-600 cm doesn't seem to match that produced in Figure 5 of Reilly et al (2019). I also suggest 5h extends back to 555 cm to match the datasets for this study.

Thank you very much for noticing this. We have adjusted Figure 5 accordingly. The depth axis at the bottom is now only covering 560 cm, to reflect the depth interval analysed as part of this study.

15. 518: The author state that increased meltwater runoff may have led to sea-ice instability. Can they add a bit more detail on the process and/or reference?

Thank you for this comment. For clarity, we have removed this sentence from the revised manuscript. In the original manuscript, this was supposed to refer to periodic meltwater discharge, which might affect sea-ice conditions via its effects on salinity and the freezing point of surface waters in Petermann Fjord.

16. Section 5.3, line 593-595: an assumption made is that dependent on ice arch configuration PF and Kane Basin will have opposing sea-ice conditions. What is this assumption based upon? The 4 satellite images in Supplementary figure 1 or published observations? If the latter then can you add the reference to the text? If this is based on the authors' observations, it would be worth adding a figure like Fig 2 that includes Kane2b sea-ice conditions to show this modern relationship and that there is indeed opposing sea-ice conditions to strengthen this assumption. This could be added to the Supp info.

Thank you for this comment. This is our own assumption, we propose in this manuscript that based on the ice arch configuration in Nares Strait the position of the spring sea-ice edge moves relative to the two core sites in Kane Basin and outer Petermann Fjord. We have added additional explanation to the text (see answer to comment #7). During years with a stable southern ice arch, the spring/summer ice edge and associated spring MIZ bloom of biomarker relevant sympagic diatoms is closer to Kane2b, and vice versa during years with no ice arch or only a northern ice arch, where a local ice edge forms at the mouth of Petermann Fjord.

In years when a southern ice arch forms, the break-up of landfast sea ice in Kane Basin and Hall Basin (indicated in Fig. 2) is almost synchronous with only few days' difference. Thus, adding the day of year of ice break-up in Kane Basin to Figure 2 would not add much additional information. Instead, we have added the day of year when the southern ice arch broke up (according to Vincent (2019); see below).

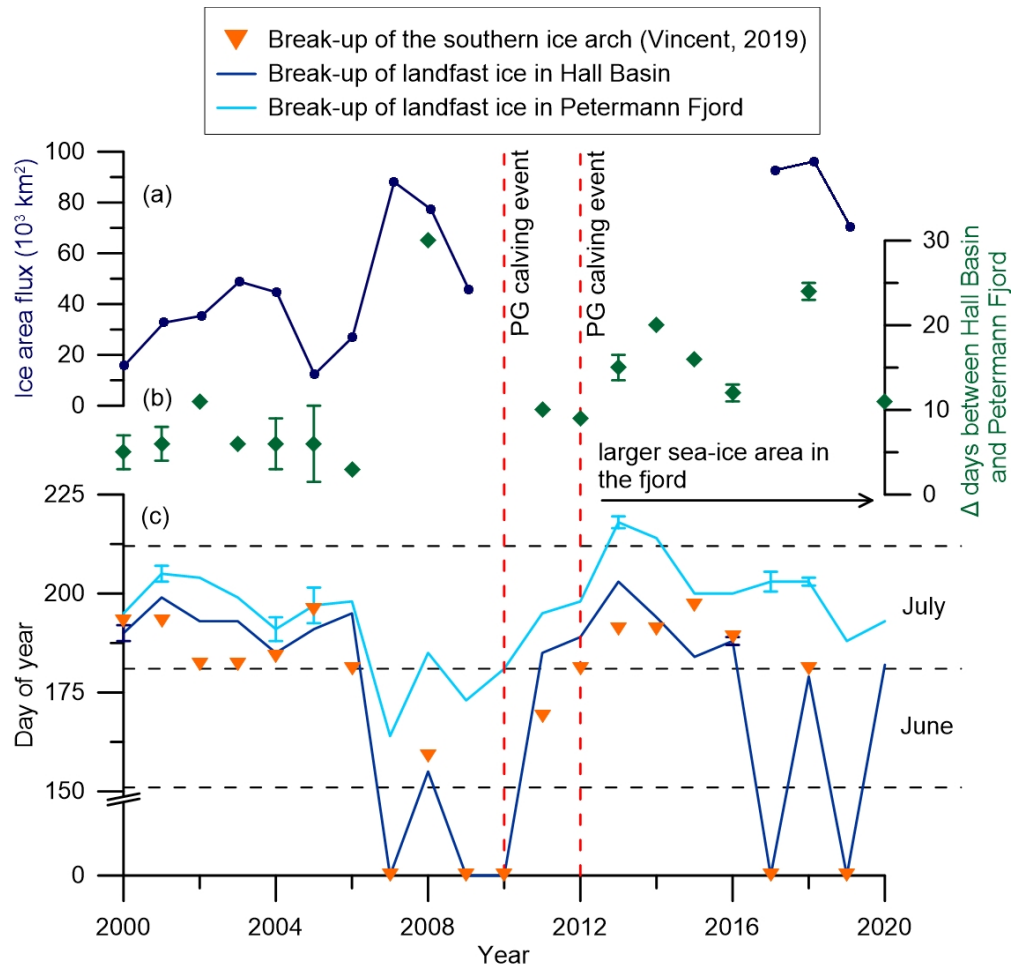

Revised Figure 2. Modern ice arch dynamics in Nares Strait. (a) Annual mean ice area flux through southern Lincoln Sea flux gate (2000-2009 (Kwok et al., 2010), 2017-2019 (Moore et al., 2021)). (b) Difference between ice break-up in Hall Basin and Petermann Fjord in days. After 2010/2012 the differences increase due to the larger sea-ice area in Petermann Fjord following the retreat of the ice tongue. (c) Time series of approximate landfast sea-ice break-up in Petermann Fjord (light blue) and Hall Basin (dark blue) from 2000-2020 estimated from <https://worldview.earthdata.nasa.gov/>. The orange triangles represent the day of year when the southern ice arch collapsed (Vincent, 2019). Where the Hall Basin and ice arch break-up record have a day of year of zero, landfast sea ice did not form in Nares Strait throughout the entire year. Where cloud cover inhibited the exact determination of the day of landfast sea-ice break-up, the average between the last clear day with landfast ice and the first clear day following ice break-up was used (Hall Basin: 2000, 2016; Petermann Fjord: 2001, 2004, 2005, 2013, 2017, 2018). Error bars indicate the timespan where cloud cover inhibited clear determination of the sea-ice state. The dashed vertical lines indicate years of substantial ice tongue calving in Petermann Fjord.

17. 640: This is the first time that 'The arrival of little auk colonies...' have been mentioned. Can you add their significance with regards to understanding sea-ice conditions?

Thank you for noticing that information on little auk ecology was missing. We have added additional information on the feeding habits of little auk and their importance in understanding NOW dynamics. Additionally, we have added recently published evidence that supports strong NOW conditions from ca. 4,400 cal yrs BP (*'Little auk are zooplanktivore, feeding on the abundant copepod population of the NOW. Thus, large colonies of little auk in Greenland are only found in vicinity of productive polynyas, where open water is available for foraging upon their arrival in spring (Davidson et al., 2018). Productive and strong NOW conditions from 4,400 cal yrs BP are also inferred based on foraminiferal assemblages from the central polynya region (Jackson et al., 2021).'*).

18. 654-662: Enhanced seasonality is an interesting outcome. Are there any other records (marine/terrestrial) that also indicates enhance seasonality to support this interpretation? Why would seasonality be enhanced during this period? You also start the sentence 'Possible reasons...' what other potential reasons are there for this and why is seasonality your preference?

Thank you very much for this comment. We have re-written this section to incorporate the possible reason for enhanced seasonality during this time period and we re-phrased it to 'A possible reason...' as we cannot think of any other reasons at this point that could cause the observed proxy patterns: *'A possible reason for this could be enhanced seasonality, in particular enhanced winter cooling, due to the increasing sea-ice extent in the Arctic Ocean (England et al., 2008; Funder et al., 2011), while summer insolation was still relatively high (though decreasing) compared to the late Holocene (Fig. 7). Modelling studies have shown that the loss of sea ice in the Arctic Ocean during the early Holocene counteracted the increased seasonality prescribed by insolation forcing, due to enhanced ocean-atmosphere heat flux during winter (Fischer and Jungclaus, 2011). The Arctic Ocean thus acted as a heat reservoir with increased latent and sensible heat flux during winter as a result of the reduced sea-ice cover (Fischer and Jungclaus, 2011). Conversely, decreasing summer insolation and the associated increase in Arctic Ocean sea-ice cover during the mid-Holocene (Fig. 7) strengthened the insulating effect of sea ice on the ocean and led to pronounced cooling during autumn/winter (Fischer and Jungclaus, 2011). Enhanced seasonality could explain the observed proxy patterns in Nares Strait between 5,500 cal yrs BP and 3,500 cal yrs BP, with an early seasonal break-up of the southern ice arch, leading to increased pelagic primary productivity in northern Nares Strait. This way, the spring ice edge bloom might still have occurred in the southern Nares Strait, followed by a rapid sea-ice retreat and open water conditions during summer/autumn, as recorded in outer Petermann Fjord. Thus, we suggest that this interval represents the transition from reduced sea-ice conditions and the lack of ice arches in Nares Strait during the late HTM towards more stable sea-ice conditions associated with the seasonal formation of a recurrent southern ice arch from at least ~4,400 cal yrs BP.'*

19. 661: What historical records are you referring to?

In the original manuscript, we intended to refer to the modern sea-ice dynamics of Nares Strait, but realize the wording was confusing. Thus, we have deleted the particular sentence.

20. 731-732: Here the authors proposed the formation of seasonal ice mélange in the fjord shortened the calving season. What is the evidence of this? Can you refer to the appropriate results?

Thank you for this comment. We have changed the wording from ice mélange to seasonal landfast sea ice, as we cannot say for sure (even though it is likely) that an ice mélange formed.

21. 741-743: I found the sentence starting 'Thus, this scenario...' hard to follow. Can you rephrase this?

Thank you for this suggestion. We have reworded this sentence and split it up in two (*'Thus, unlike today, the formation of a southern ice arch between 5,500 cal yrs BP and 3,500 cal yrs BP did likely not lead to a prolonged landfast ice season in Nares Strait. Consequently, the longer mobile sea-ice season in Nares Strait might have contributed to AAW inflow to Petermann Fjord preventing the formation of an ice tongue throughout this interval.'*)

#### **Specific comments (technical).**

Thank you for these comments. We have adjusted the text and figures accordingly. However, we did not add a reference to the sea-ice categories (comment 27), as this is supposed to be a clarification of the different descriptors we are using throughout the manuscript for consistency when talking about relative changes in the sea-ice concentrations. We have clarified this in the manuscript text (*'For clarity, we will describe past sea-ice conditions using the following categories in order of increasing average sea-ice concentration: ice free, reduced seasonal sea ice, enhanced seasonal sea ice, and near-perennial (in order of increasing average sea-ice concentration for a given area).'*).

22. 41: add a, after Historically.
23. Figure 1A: there are purple currents that have not been labelled. Can you state what these are in the caption?
24. 108: remove 'the' before Baffin Bay
25. 109: capital C for Robeson Channel
26. 134: remove 'vast'
27. 195-197: add ref to end of the sentence
28. Section 3.3 Planktonic and benthic foraminiferal abundances: change to 3.4
29. 298 and 300: add ref to end of sentences.
30. Line 391: change to 'These become especially apparent in the dinosterol and campesterol concentrations between 400-500 cm and the  $\beta$ -sitosterol concentrations (add core depth)
31. 447: Add Washington and Hall Land onto Figure 1c
32. 544: I suggest you change the wording '...bear witness of...' to suggest prolonged
33. 560: I suggest you do not start the sentence 'Especially...'. Also, it is not clear from this sentence whether both declines in IP25 fluxes are accompanied by a decrease in TOC but the second is more significant, or only the second IP25 decline is accompanied by a decrease in TOC.
34. 602 and 603: be consistent with landfast or fast.



35. 613- 615: I suggest you rephrase this sentence to 'Thus, abundant driftwood delivery to Ellesmere Island/northeastern Greenland together with the formation of beach ridges is indicative of seasonally open waters along the coast (Fig. 6A).
36. Figure 8: A simplified version of Fig. 6 is not needed. I suggest you remove Fig. 8 and add the ages to each panel in Fig. 6
37. Supplementary Figure 1: can you include what ice arch state each image is showing in the caption and label each satellite image a), b), c) and d)?
38. Figures: overall the figures are nicely presented. My only minor criticism is that the y-axis does not line up to the graphs. Whilst I appreciate this is done to enable the graphs to fit on one page, it does make it harder to see the values and which axis relates to which graph. In some cases, the lower axis overlaps with the overlying graph and the overlying graph is covering some of the data points e.g., Fig 4e. Can the authors find a way to make this easier for the reader to view?
